# Supplementary material for: Combining Experimental and Modeling Approaches to Understand Genotype x Sowing Date x Environment Interaction Effects on Emergence Rates and Grain Yield of Soybean
Source: Front Plant Sci. 2020 Sep 2;11:558855. doi: 10.3389/fpls.2020.558855 (PMC7493624; doi:10.3389/fpls.2020.558855)
Supplement: Supplementary Material S1 — Raw data on the response of the three cultivars to the tested temperatures and water potentials. [file Table_1.xlsx]

## Sheet: Germination x Temperature
Germination response of three soybean cultivars to a range of temperatures under laboratory conditions
Variety	Time after sowing (h)	Germination at 3.6 °C (%)	Time after sowing (h)	Germination at 6.56 °C (%)	Time after sowing (h)	Germination at 10 °C (%)	Time after sowing (h)	Germination at 15 °C (%)	Time after sowing (h)	Germination at 20 °C (%)	Time after sowing (h)	Germination at 25 °C (%)	Time after sowing (h)	Germination at 30 °C (%)	Time after sowing (h)	Germination at 35 °C (%)	Time after sowing (h)	Germination at 37.68 °C (%)	Time after sowing (h)	Germination at 40 °C (%)
Ecudor	0	0	0	0	0	0	0	0	0	0	0	0	0	0	0	0	0	0	0	0
	19	0	40	0	62.7792	1	22.3557	0	14.994	0	16.0264	23.9565	16.6156	30.8177	16.1144	15.2894	15.0491	0	14.5978	0
	42	0	112	0	66.9767	1	32.0641	16.6087	25.2882	69.5	20.824	56.2609	24.3943	73.6001	26.7821	49.0387	20.1534	6.10795	19.9281	0
	66	0	136	4.08333	72.8471	1	46.4337	57	39.1417	91.875	26.715	75.7826	37.4314	91.1973	39.8418	79.6346	24.7694	17.0928	24.9009	0
	139	0	162	18.5978	87.0239	29.1232	56.5816	74.7826	48.5654	97.9583	41.776	88.4783	48.251	96.735	50.4197	90.6385	38.6744	65.9564	38.3724	9.02778
	161	0	184	26.0254	96.8426	43.5091	70.466	87.3913	63.0607	97.9583	50.9849	97.913	62.5717	97.822	63.1754	95.2381	43.2824	81.7708	43.8328	18.0556
	187	0	208	38.4909	110.757	66.1902	81.1363	92.8261	72.07	99	64.9151	99	72.5146	98.9583	73.9788	97.619	48.7868	86.4583	48.6844	18.0556
	210	0	233	63.3841	120.492	74.5344	94.0379	94.8261	87.4582	99	74.0744	100	86.3747	100	87.0172	100	62.6622	94.7917	64.0569	18.0556
	235	0	257	79.1975	134.631	85.788	104.805	96.8261	96.8025	99	89.8711	100	99.14	100	97.559	100	67.8593	97.9167	68.8834	18.0556
	336	0	282	87.4475	145.069	91.9167	118.437	97.8261	159.002	100							72.7066	97.9167
	354	0	304	91.5725	158.981	94.9583	128.181	98.913									86.4147	100
	379	0	328	92.6594	163.34	94.9583	144.589	98.913
	401	0	352	92.6594	168.92	95.9583	165.789	100
	476	0	376	93.7011	184.616	96.9583
	521	0	402	96.8714	192.544	99
	569	0	426	98.913	207.453	99
	644	0	448	100	217.027	99
	691	0	472	100	230.621	100
	738	0	496	100
	810	0	526	100
	857	6.25	546	100
	905	25
	1058	25
	1145	31.25																												N° graine total	100
	1193	50																												Classe ST	Germination (%)
	1241	62.5																												1-5	0
	1313	62.5																												5-10	1
	1362	62.5																												10-15	23
	1409	62.5																												15-20	41
	1505	62.5																												20-25	22
	1577	68.75																												25-35	10
	1652	68.75
	1698	68.75																													97
	1745	68.75
	1817	68.75
	1866	68.75
	1913	68.75
	1986	68.75
	2033	68.75
	2081	68.75
	2153	68.75
	2201	81.25
	2249	81.25
	2321	93.75
	2369	100
	2418	100
Variety	Time after sowing (h)	Germination at 3.6 °C (%)	Time after sowing (h)	Germination at 6.56 °C (%)	Time after sowing (h)	Germination at 10 °C (%)	Time after sowing (h)	Germination at 15 °C (%)	Time after sowing (h)	Germination at 20 °C (%)	Time after sowing (h)	Germination at 25 °C (%)	Time after sowing (h)	Germination at 30 °C (%)	Time after sowing (h)	Germination at 35 °C (%)	Time after sowing (h)	Germination at 37.68 °C (%)	Time after sowing (h)	Germination at 40 °C (%)
Isidor	0	0	0	0	0	0	0	0	0	0	0	0	0	0	0	0	0		0
	19	0	40	0	62.7792	0	22.3557	0	14.994	0	16.0264	15.2609	16.6156	27	16.1144	1.08696	15.0491	0	14.5978	0
	42	0	112	0	66.9767	0	32.0641	1	25.2882	28.4728	20.824	53.1304	24.3943	76	26.7821	73.3202	20.1534	0	19.9281	0
	66	0	136	6	72.8471	0	46.4337	43.0353	39.1417	74.971	26.715	78.4783	37.4314	99	39.8418	95.5534	24.7694	0	24.9009	0
	139	0	162	20.25	87.0239	16	56.5816	79.0609	48.5654	91.6594	41.776	91.913	48.251	99	50.4197	97.7767	38.6744	0	38.3724	0
	161	0	184	45.7083	96.8426	20	70.466	94.9968	63.0607	96.9583	50.9849	99	62.5717	99	63.1754	100	43.2824	0	43.8328	0
	187	0	208	67.125	110.757	34	81.1363	95.9583	72.07	98	64.9151	100	72.5146	100	73.9788	100	48.7868	0	48.6844	0
	210	0	233	73.2917	120.492	52	94.0379	95.9583	87.4582	100	74.0744	100	86.3747	100	87.0172	100	62.6622	0	64.0569	0
	235	0	257	85.625	134.631	72	104.805	97.9583	96.8025	100	89.8711	100	99.14	100	97.559	100	67.8593	0	68.8834	0
	336	0	282	91.7917	145.069	84	118.437	99	159.002	100
	354	0	304	95.875	158.981	91	128.181	100
	379	0	328	95.875	163.34	91	144.589	100
	401	0	352	95.875	168.92	92	165.789	100
	476	0	376	95.875	184.616	97
	521	0	402	97.9167	192.544	98
	569	0	426	98.9583	207.453	98
	644	0	448	98.9583	217.027	98
	691	0	472	100	230.621	99
	738	0	496	100
	810	5.41667	526	100
	857	5.41667	546	100
	905	10.8333
	1058	10.8333
	1145	21.875
	1193	31.6667
	1241	34.7917
	1313	44.5833
	1362	46.6667
	1409	46.6667
	1505	47.9167
	1577	55.2083
	1652	57.2917
	1698	60.4167
	1745	60.4167
	1817	63.75
	1866	63.75
	1913	77.7083
	1986	77.7083
	2033	79.7917
	2081	81.0417
	2153	83.125
	2201	83.125
	2249	97.5
	2321	97.5
	2369	98.75
	2418	100
Variety	Time after sowing (h)	Germination at 3.6 °C (%)	Time after sowing (h)	Germination at 6.56 °C (%)	Time after sowing (h)	Germination at 10 °C (%)	Time after sowing (h)	Germination at 15 °C (%)	Time after sowing (h)	Germination at 20 °C (%)	Time after sowing (h)	Germination at 25 °C (%)	Time after sowing (h)	Germination at 30 °C (%)	Time after sowing (h)	Germination at 35 °C (%)	Time after sowing (h)	Germination at 37.68 °C (%)	Time after sowing (h)	Germination at 40 °C (%)
Santana	0	0	0	0	0	0	0	0	0	0	0	0	0	0	0	0	0	0	0	0
	19	0	40	0	62.7792	0	22.3557	0	14.994	0	16.0264	14.6087	16.6156	35.3623	16.1144	10.7955	15.0491	0	14.5978	0
	42	0	112	0	66.9767	0	32.0641	8.04167	25.2882	36.5417	20.824	56.1739	24.3943	69.7736	26.7821	70.928	20.1534	4.00362	19.9281	0
	66	0	136	0	72.8471	1.04167	46.4337	66.4583	39.1417	79.4167	26.715	76.0435	37.4314	87.3641	39.8418	93.3712	24.7694	10.1481	24.9009	0
	139	0	162	0	87.0239	24.625	56.5816	83.7083	48.5654	89.7083	41.776	90.4783	48.251	95.625	50.4197	97.822	38.6744	58.993	38.3724	19.8214
	161	0	184	7.8109	96.8426	39.9167	70.466	92.8333	63.0607	94.875	50.9849	98.913	62.5717	97.7083	63.1754	97.822	43.2824	71.1669	43.8328	23.3929
	187	0	208	20.5513	110.757	78.625	81.1363	97.9583	72.07	100	64.9151	98.913	72.5146	97.7083	73.9788	98.9583	48.7868	80.4486	48.6844	31.9643
	210	0	233	24.6378	120.492	89.8333	94.0379	99	87.4582	100	74.0744	100	86.3747	100	87.0172	100	62.6622	90.9804	64.0569	31.9643
	235	0	257	41.0613	134.631	95.9583	104.805	99	96.8025	100	89.8711		99.14		97.559		67.8593	90.9804	68.8834	31.9643
	336	0	282	64.4604	145.069	97	118.437	100	159.002	100
	354	0	304	78.114	158.981	98	128.181	100
	379	0	328	80.1557	163.34	98	144.589	100
	401	0	352	83.2911	168.92	98	165.789	100
	476	0	376	91.7259	184.616	98
	521	0	402	97.9968	192.544	99
	569	0	426	100	207.453	99
	644	0	448	100	217.027	99
	691	0	472	100	230.621	99
	738	0	496	100
	810	1.92308	526	100
	857	3.11355	546	100
	905	3.11355
	1058	3.11355
	1145	3.11355
	1193	4.30403
	1241	9.34066
	1313	9.34066
	1362	9.34066
	1409	12.4542
	1505	24.4559
	1577	33.064
	1652	34.9871
	1698	40.9395
	1745	45.9815
	1817	52.9466
	1866	56.518
	1913	67.6147
	1986	69.9957
	2033	69.9957
	2081	79.902
	2153	81.0924
	2201	81.0924
	2249	95.8683
	2321	95.8683
	2369	97.3389
	2418	100

## Sheet: Germination x waterPotential
Seed germination the three soybean genotypes at different water potentials.
			Nombre of germinated seeds out of total (25)/Petri dish at each observation after sowing
Variété	Replicate	Treatment	25h30	48h25	73h45	96h47	163h50	187h46	211h16	234h56	258h05	331h21	378h57	TOTAL	Germinations (%)
ECUDOR	1	Control	0	12	7	3	0	0	0	0	0	0		22	88
ISIDOR	1	Control	0	20	4	0	0	0	1					25	100
SANTANA	1	Control	0	6	11	4	2	0	0	0	0	0		23	92
ECUDOR	1	PEG -0,1	0	13	5	1	4	0	0	0	0	0		23	92
ISIDOR	1	PEG -0,1	0	11	9	0	3	1	0	0	0	0		24	96
SANTANA	1	PEG -0,1	0	0	10	5	6	0	3	0	0	0		24	96
ECUDOR	1	PEG -0,25	0	4	11	7	1	0	0	0	0	0		23	92
ISIDOR	1	PEG -0,25	0	2	10	7	3	0	0	0	0	0		22	88
SANTANA	1	PEG -0,25	0	0	3	11	7	0	1	0	0	1		23	92
ECUDOR	1	PEG -0,50	0	0	0	7	8	1	0	0	0	0	0	16	64
ISIDOR	1	PEG -0,50	0	0	0	3	7	0	0	0	0	0	0	10	40
SANTANA	1	PEG -0,50	0	0	0	0	4	1	1	0	0	1	0	7	28
ECUDOR	2	Control	2	9	8	2	2	2						25	100
ISIDOR	2	Control	1	10	12	2								25	100
SANTANA	2	Control	0	5	7	7	2	0	0	0	0	0		21	84
ECUDOR	2	PEG -0,1	0	7	11	4	1	0	0	0	0	0		23	92
ISIDOR	2	PEG -0,1	0	10	6	3	2	0	1	0	0	0		22	88
SANTANA	2	PEG -0,1	0	0	9	6	4	0	1	0	0	0		20	80
ECUDOR	2	PEG -0,25	0	2	5	6	5	0	1	0	0	0		19	76
ISIDOR	2	PEG -0,25	0	0	10	2	4	0	0	0	0	0		16	64
SANTANA	2	PEG -0,25	0	0	3	8	4	1	0	0	0	0		16	64
ECUDOR	2	PEG -0,50	0	0	0	1	3	1	1	1	0	0	0	7	28
ISIDOR	2	PEG -0,50	0	0	0	0	2	0	0	0	0	0	0	2	8
SANTANA	2	PEG -0,50	0	0	0	0	0	0	0	0	0	0	0	0	0
ECUDOR	3	Control	0	17	7	0	0	0	0	0	0	0		24	96
ISIDOR	3	Control	4	10	8	1	0	0	1	0	0	0		24	96
SANTANA	3	Control	0	3	13	2	3	0	0	0	0	0		21	84
ECUDOR	3	PEG -0,1	0	14	5	5	0	0	0	0	0	0		24	96
ISIDOR	3	PEG -0,1	0	13	8	2	2							25	100
SANTANA	3	PEG -0,1	0	0	10	9	0	1	1	0	0	0		21	84
ECUDOR	3	PEG -0,25	0	4	9	10	0	0	0	0	0	0		23	92
ISIDOR	3	PEG -0,25	0	0	11	8	3	0	0	0	0	0		22	88
SANTANA	3	PEG -0,25	0	0	6	17	1	0	0	0	0	0		24	96
ECUDOR	3	PEG -0,50	0	0	1	7	3	0	1	0	0	0	0	12	48
ISIDOR	3	PEG -0,50	0	0	0	1	2	3	0	0	0	0	0	6	24
SANTANA	3	PEG -0,50	0	0	0	2	2	1	2	0	0	0	0	7	28
ECUDOR	4	Control	1	11	9	4								25	100
ISIDOR	4	Control	2	8	12	1	1	0	0	0	0	0		24	96
SANTANA	4	Control	0	6	9	4	2	0	1	0	0	0		22	88
ECUDOR	4	PEG -0,1	0	15	1	4	3	1	0	0	0	0		24	96
ISIDOR	4	PEG -0,1	0	5	13	2	0	2	1	0	0	0		23	92
SANTANA	4	PEG -0,1	0	2	9	7	1	0	1	0	0	0		20	80
ECUDOR	4	PEG -0,25	0	3	13	5	1	0	1	0	0	0		23	92
ISIDOR	4	PEG -0,25	0	0	11	9	0	0	0	1	0	0		21	84
SANTANA	4	PEG -0,25	0	0	7	13	4	0	0	0	1			25	100
ECUDOR	4	PEG -0,50	0	0	0	12	3	0	1	0	0	0	0	16	64
ISIDOR	4	PEG -0,50	0	0	0	1	2	0	0	1	0	0	1	5	20
SANTANA	4	PEG -0,50	0	0	0	2	3	0	0	0	0	0	0	5	20
